# Supplementary material for: Armor-like passivated CsPbBr3 quantum dots: boosted stability with hand-in-hand ligands and enhanced performance of nuclear batteries
Source: Royal Society of Chemistry journal article supplement (doi:10.1039/d0ta12365j), 2021-01-01
Supplement: d0ta12365j1.pdf [file d0ta12365j1.pdf]

## Supporting Information

### **Armor-Like Passivated CsPbBr<sub>3</sub> Quantum Dots: Boosted Stability with Hand-in-Hand Ligands and Enhanced Performance of Nuclear Battery**

Dandan Yang,<sup>a#</sup> Zhiheng Xu,<sup>b#</sup> Chunhui Gong,<sup>c</sup> Lin Su,<sup>d</sup> Xiaoming Li,<sup>\*a</sup> Xiaobin, Tang,<sup>b</sup> Dongling Geng,<sup>a</sup> Cuifang Meng,<sup>a</sup> Feng Xu,<sup>d</sup> Haibo Zeng<sup>\*a</sup>

<sup>a</sup> MIIT Key Laboratory of Advanced Display Materials and Devices, Institute of Optoelectronics & Nanomaterials, College of Materials Science and Engineering, Nanjing University of Science and Technology, Nanjing 210094, China.

<sup>b</sup> Department of Nuclear Science and Technology, Nanjing University of Aeronautics and Astronautics, Nanjing 211106, China.

<sup>c</sup> School of Environmental and Biological Engineering, Nanjing University of Science and Technology, Nanjing 210094, China.

<sup>d</sup> SEU-FEI Nano-Pico Center, Key Laboratory of MEMS of Ministry of Education, Southeast University, Nanjing 210096, China.

## Experimental part

### Materials

Lead (II) bromide ( $\text{PbBr}_2$ , 99%), Lead chloride ( $\text{PbCl}_2$ , 98%), Lead chloride ( $\text{PbI}_2$ , 98%) Cesium carbonate ( $\text{Cs}_2\text{CO}_3$ , 99.9%), Oleylamine (OAm, 80-90%), Oleic acid (OA, 90%), 4-Dodecyl benzene sulfonic acid (4-DBSA, 95%), Didodecyldimethylammonium bromide (DDAB, 98%) and Didodecyldimethylammonium chloride (DDACl, 98%) were purchased from Aladdin. Undecylamine (98%), Trioctylphosphine oxide (TOPO), Tributylphosphine oxide (TBPO), Triphenylphosphine oxide, 1-octadecene (ODE, 90%), tert-Butylbenzene, Ethyl acetate (EA, AR, 97%), Hexane (anhydrous, 99.5%) and Toluene were bought from Macklin. All chemicals were used without any further purification.

### Preparation of Cesium oleate (CsOA) precursors

$\text{Cs}_2\text{CO}_3$  (0.36g, 1.1 mmol), octadecene (15 mL) and oleic acid (1.5 mL) were added into 100mL 3-neck flask, exhausted for half an hour at 120 °C, and then heated under Ar to 150 °C until all  $\text{Cs}_2\text{CO}_3$  reacted with OA. The solution was kept at 120 °C to avoid solidification before injection.

### Preparation of Cesium dodecylbenzene sulfonate (CsDBSA) precursors

$\text{Cs}_2\text{CO}_3$  (0.36g, 1.1 mmol), octadecene (10 mL) and DBSA (4.5 mmol) were added into 100mL 3-neck flask, exhausted for half an hour at 120 °C until all  $\text{Cs}_2\text{CO}_3$  reacted with DBSA. The solution was kept at 120 °C to avoid solidification before injection.

### Synthesis of OAm-QDs

OAm-QDs were synthesized as described previously. Briefly,  $\text{PbBr}_2$  (0.54 mmol, 0.2 g), ODE (15 mL), OA (1.5 mL), and OAm (1.5 mL) were loaded into a 100 mL 3-neck flask and degassed for half an hour at 120 °C under Ar flow. After complete dissolution of  $\text{PbBr}_2$  salt, the temperature was increased to 160 °C and then maintained for another 30 min under Ar atmosphere. The preheated Cs-oleate solution was swiftly injected into the transparent precursor solution. After 5 seconds, the reaction mixture was cooled down using a water bath.

### Synthesis of CsOA-QDs

$\text{PbBr}_2$  (0.27 mmol, 0.1 g), ODE (8 mL), tert-Butylbenzene (5 mL), DDAB (75 mg), OAm (0.35 mL) and CsOA (0.75 mL) were loaded into a 50 mL Teflon lined autoclave, and then reacted at 150 °C in a rolling oven for 1 h. Ethyl acetate was added into the crude solution with a volume ratio of 1:3 and the mixture were centrifuged for 1 min at 9000 rpm. The purifying procedures were repeated for another one time. The precipitate was dispersed in 2 mL of toluene or to obtain a clear solution.

### Ligand Exchange for DP-QDs

The DP-QDs precipitation treated with ethyl acetate was dissolved in toluene solution containing the TOPO ligand (3 mL, 0.037M) and the mixture was vigorously stirred for 30s. and then the DP-QDs was washed by ethyl acetate followed by centrifugation at 9000 rpm for 1 minute and re-dispersion in toluene. The DP-QDs precipitation was dissolved in toluene solution containing the TBPO (3ml, 0.037M) and PhOP (3 mL, 0.037M) in a similar way, respectively. Finally, the TOPO-QDs, TBPO-QDs and PhOP-QDs were obtained to research the surface states of DP-QDs.

## Characterization

Powder X-ray diffraction data was recorded on Bruker D8 Advance using Ni-filtered Cu K $\alpha$  radiation ( $\lambda = 1.542 \text{ \AA}$ ). UV-vis spectra were recorded in the range of 300-700 nm by using a UV spectrometer (Shimadzu UV-3600). The photoluminescence (PL) measurements were collected on a Varian Cary Eclipse instrument. Transmission electron microscopy (TEM) images were collected on a TECNAI G2 20 LaB6 instrument at 200 kV. X-ray photoelectron spectroscopy (XPS) measurements were performed using an achromatic Al K $\alpha$  source (148.8 eV) and a double pass cylindrical mirror analyzer (PHI QUANTERA II). FTIR results were measured with a Tensor-27 spectrometer. The absolute PL QY of the solution of QDs was determined using a Quantaaurus-QY absolute photoluminescence quantum yield spectrometer (C11347-11, Hamamatsu Photonics, Japan). The lifetimes of PL were detected by a homemade instrument with a 375 nm picosecond laser.  $^1\text{H}$ -NMR spectra were recorded on a Bruker Advance III HD-500 MHz spectrometer equipped with a BBO smart probe.

## The performance testing for radioluminescent nuclear Battery

Radiation luminescence imaging uses an electron-multiplying charge-coupled device (EMCCD) camera (Andor iXon Ultra 888, USA) equipped with a Canon EF 24-70 mm f/2.8L II USM zoom lens. The camera lens is  $\Phi 82$  mm, and the image resolution is  $1024 \times 1024$  effective pixels. The excitation source used for radioluminescence is a 50 W Mo X-ray tube (Shanghai KeyWay Electron Company Ltd. KYW900A, China). A dual-channel system source-meter instrument (Keithley 2636A, USA) is used to test the electrical performance of the battery and obtain the volt-ampere characteristic curve. All optical and electrical performance tests are carried out at room temperature of about 298 K and atmospheric pressure of 1 bar, as far as possible to avoid interference caused by external light, electromagnetic and other factors. The physical objects of related equipment are shown in **Fig. S22†**. The radiation source used in the study of the long-term radiation damage effect of the CsPbBr<sub>3</sub> films is the Co-60 source frame with a total activity of 185,000 Curies.

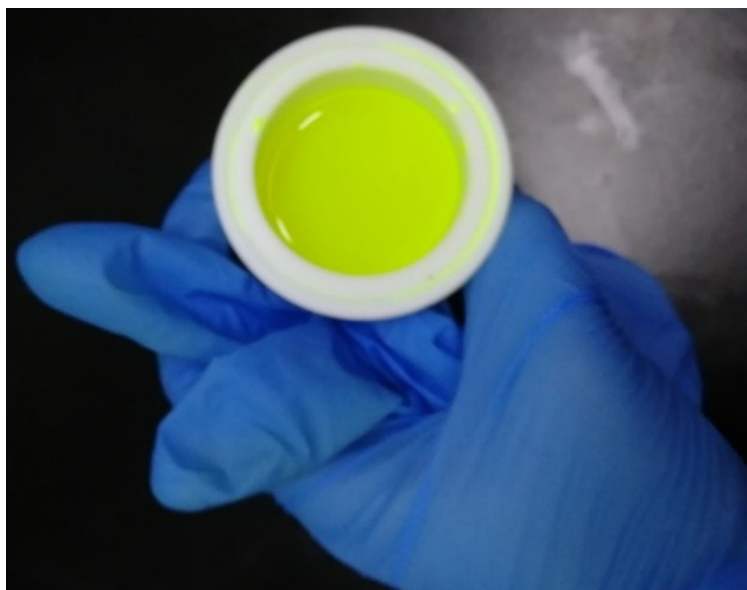

**Fig. S1** Photo of the DP-CsPbBr<sub>3</sub> solution under natural light.

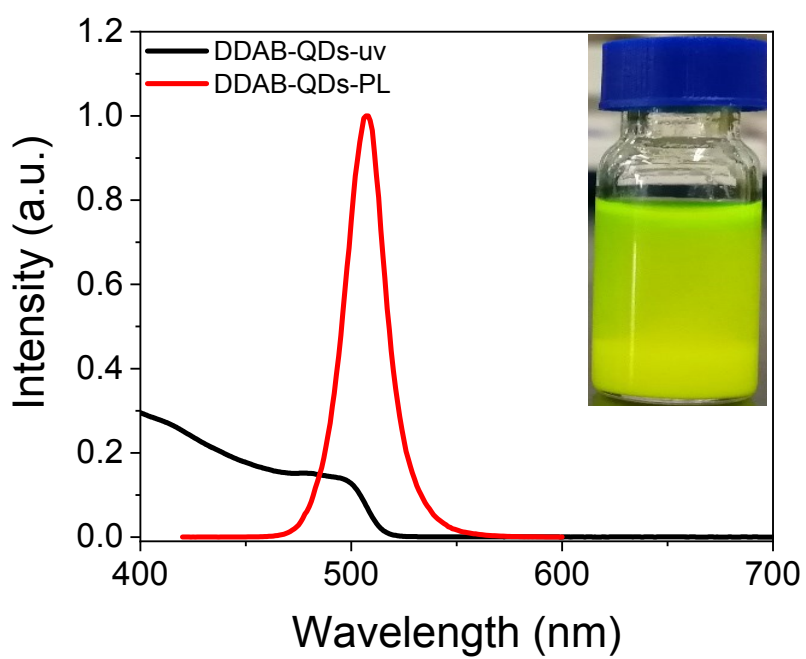

**Fig. S2** Absorbance and PL spectra of DDAB-QDs dispersions in hexane.

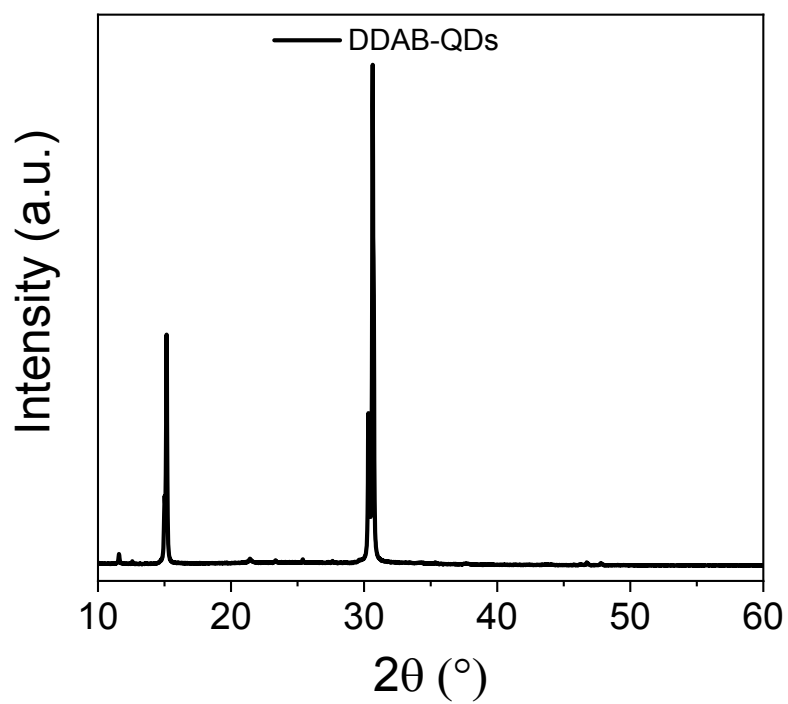

**Fig. S3** XRD pattern of DDAB-QDs.

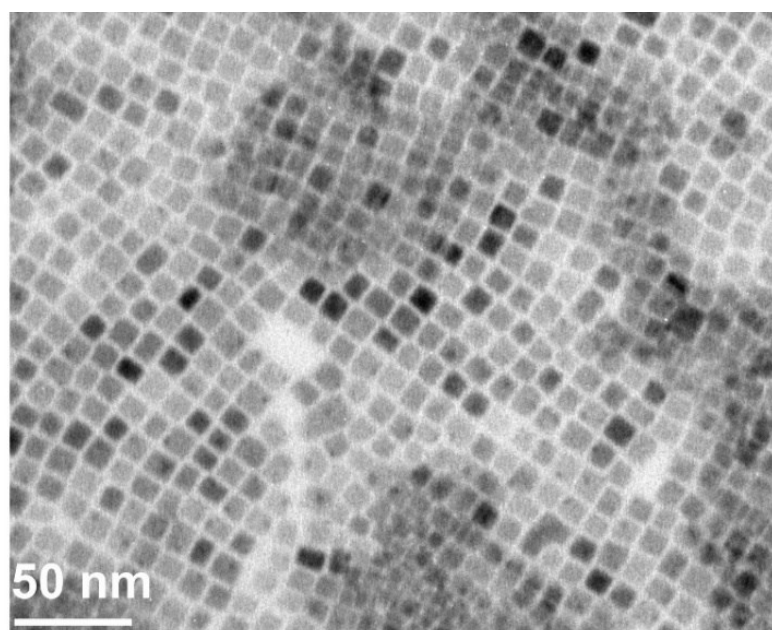

**Fig. S4** TEM image of CsOA-QDs.

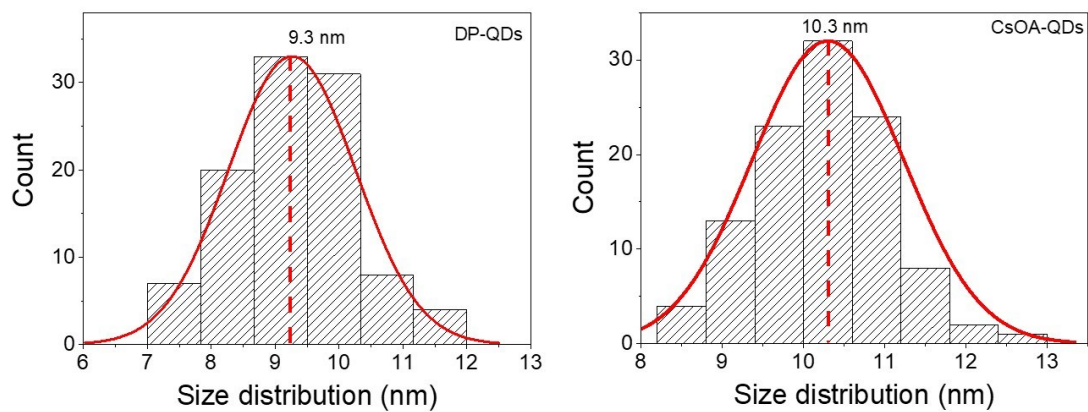

Fig. S5 Size distribution of DP-QDs (left) and CsOA-QDs (right).

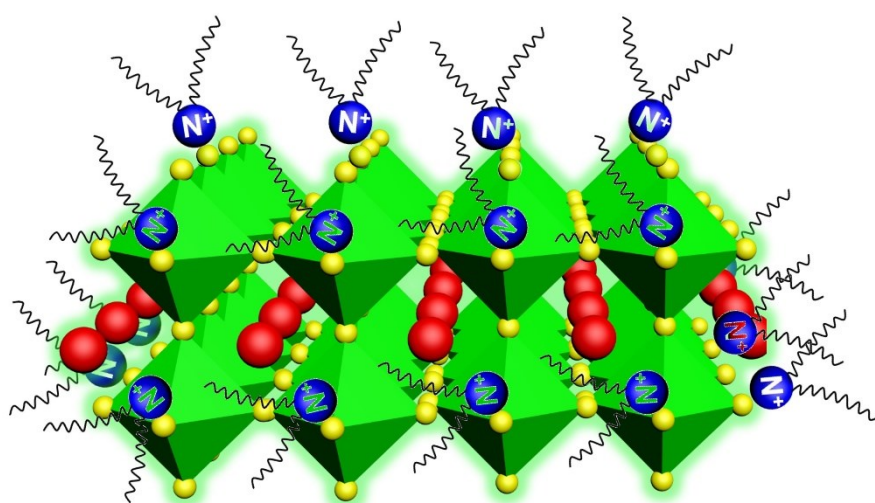

Fig. S6 Structure schematic diagram of DDAB-QDs.

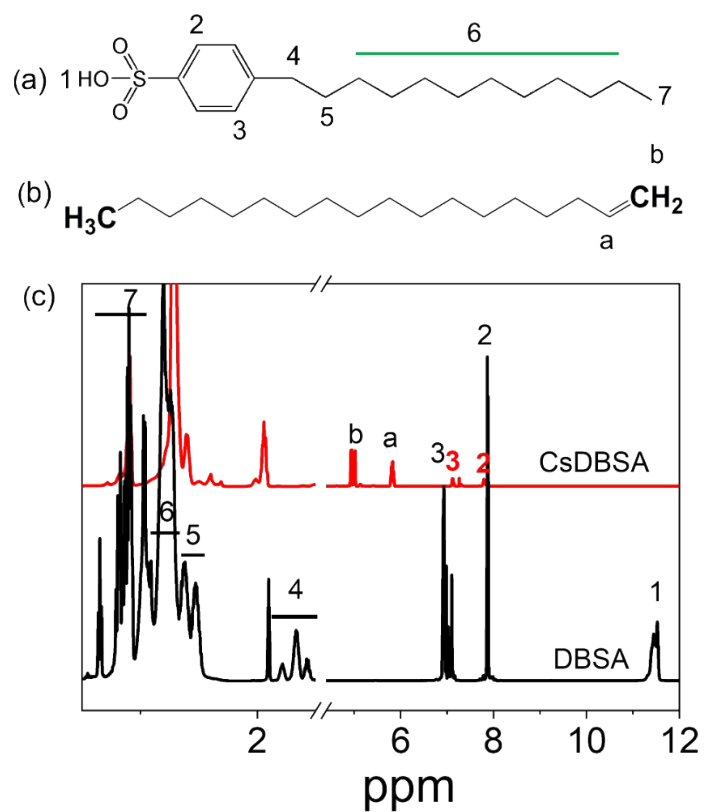

**Fig. S7** Molecular structural formula and location number of (a) DBSA and (b) ODE; (c) the <sup>1</sup>H NMR patterns of DBSA and CsDBSA.

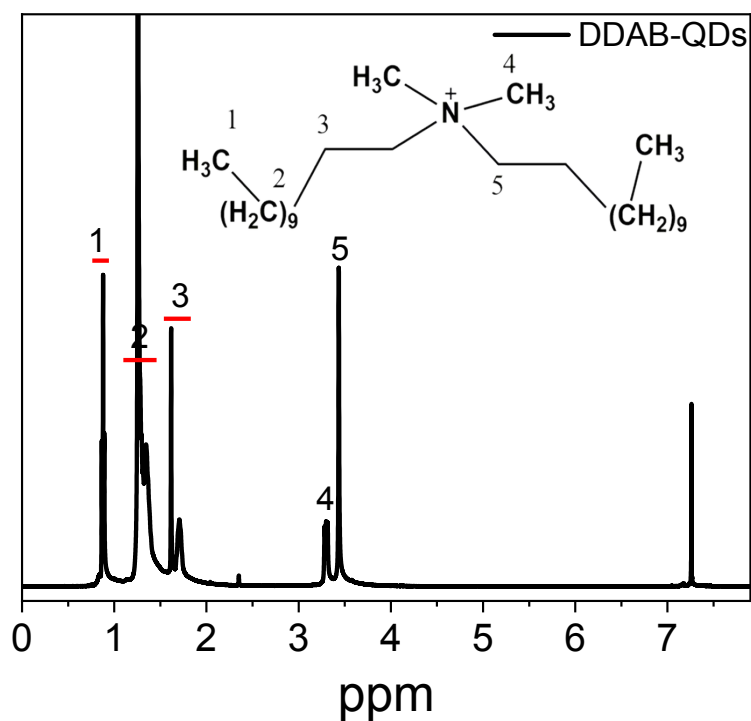

**Fig. S8** The <sup>1</sup>H NMR pattern of DDAB-QDs and Molecular structural formula and location number of DDAB.

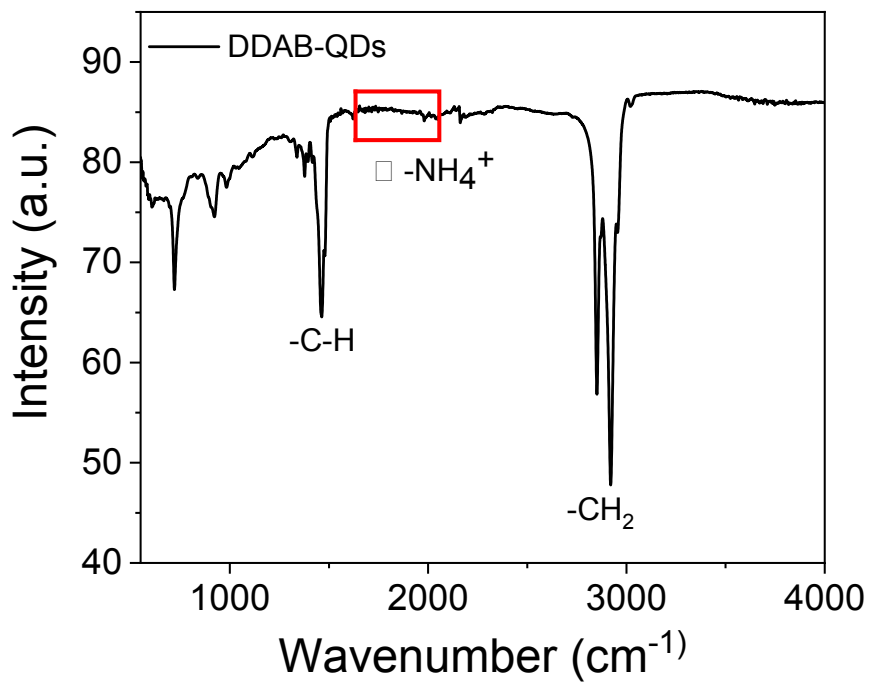

Fig. S9 The FT-IR pattern of DDAB-QDs.

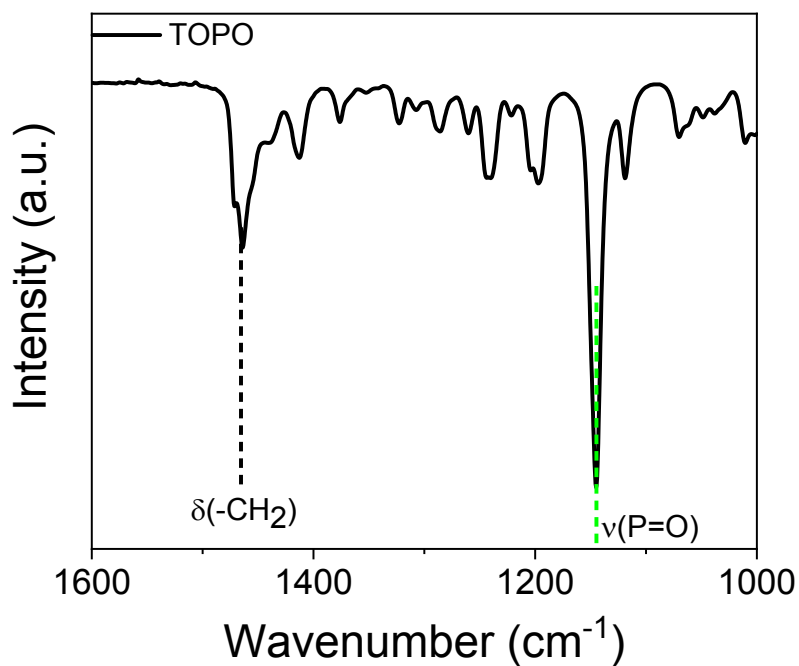

Fig. S10 The FTIR pattern of TOPO ligand.



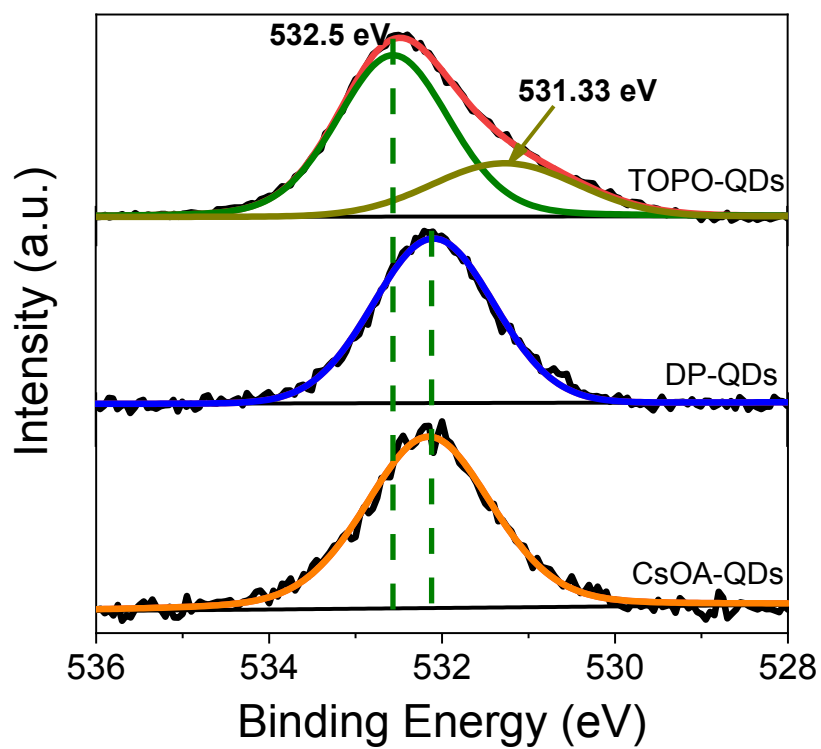

Fig. S11 The XPS spectra of O1s for CsOA-QDs, DP-QDs and TOPO-QDs.

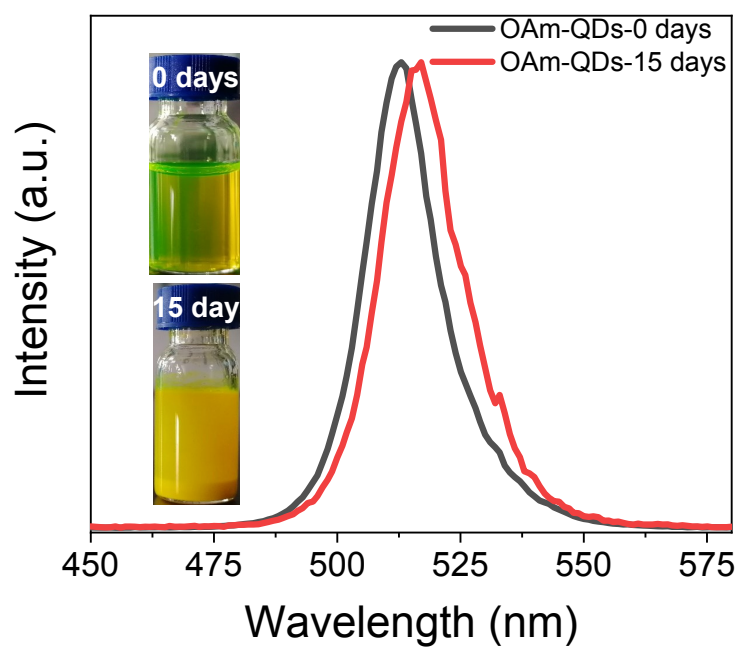

Fig. S12 PL spectra and photos of OAm-QDs at 0 days and 15 days.

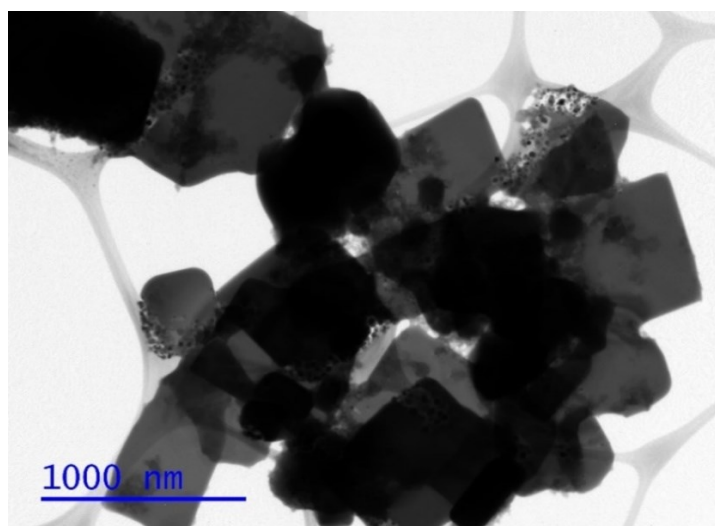

**Fig. S13** TEM image of OAm-QDs after 15 days.

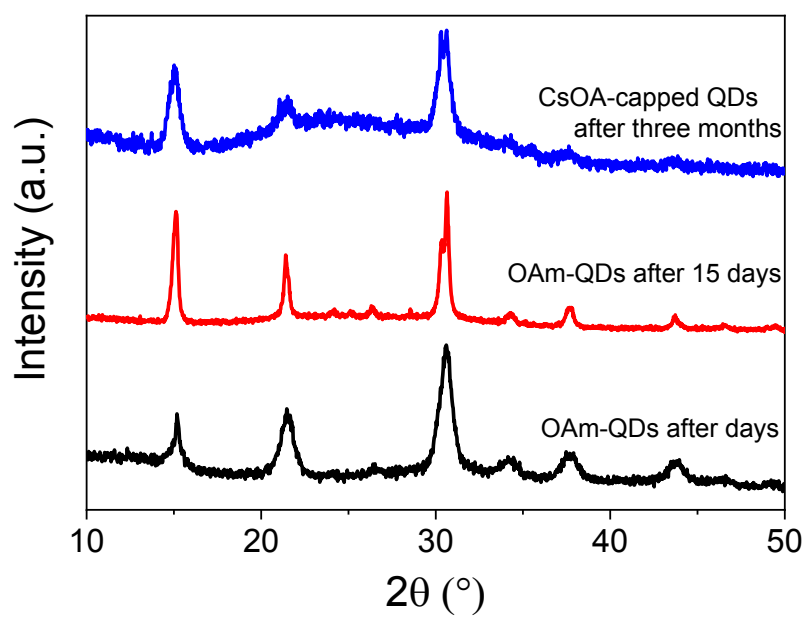

**Fig. S14** PXRD patterns of OAm-QDs after 0 (black line) and 15 days (red line) and CsOA-QDs (blue line) after three months.

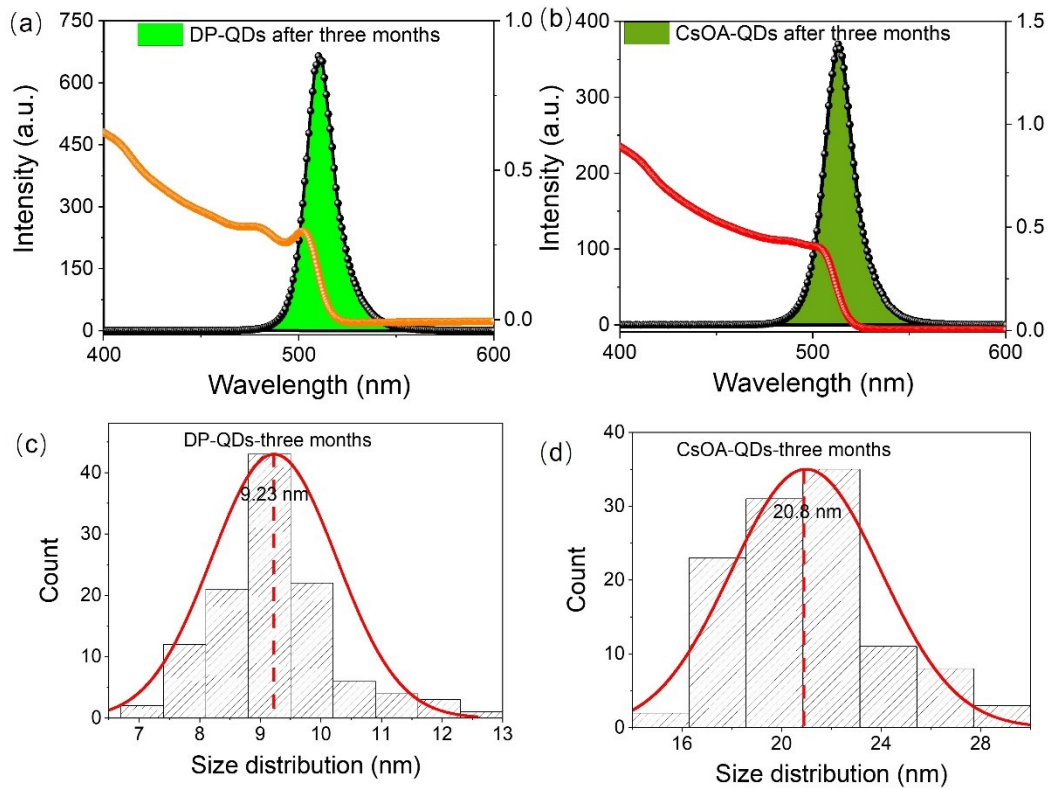

**Fig. S15** Absorption and PL spectra of (a)DP-QDs and (b) CsOA-QDs after three months under air in closed vials. The size distribution of (c)DP-QDs and (d) CsOA-QDs after three months.

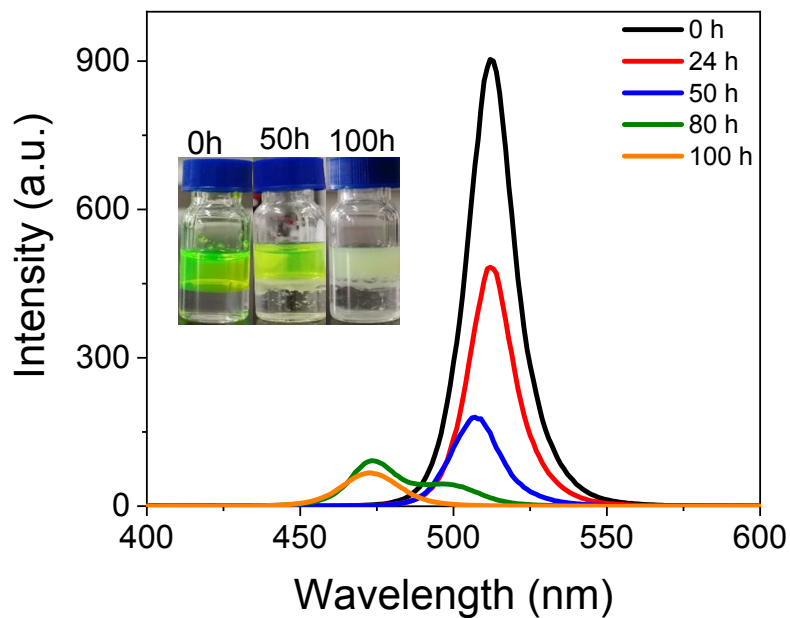

**Fig. S16** PL emission spectra at different time points in the continuous water treatment process of OAm-QDs.

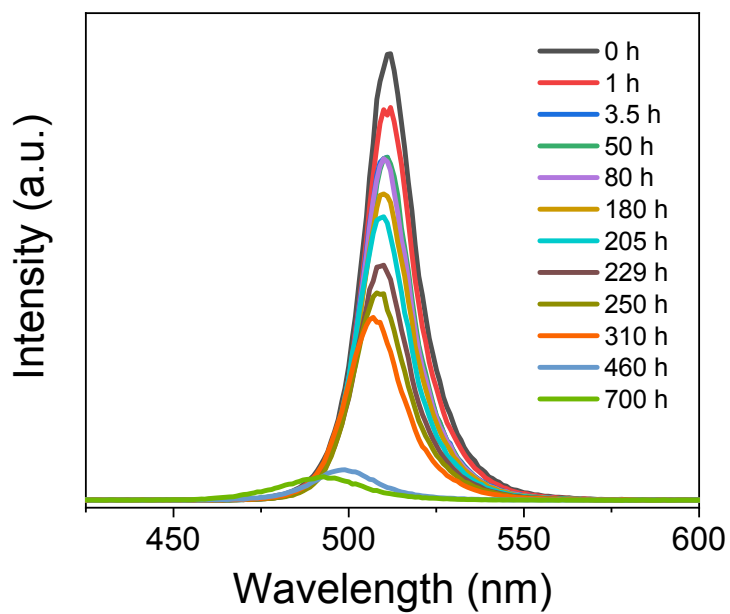

**Fig. S17** PL emission spectra at different time points in the continuous water treatment process of CsOA-QDs.

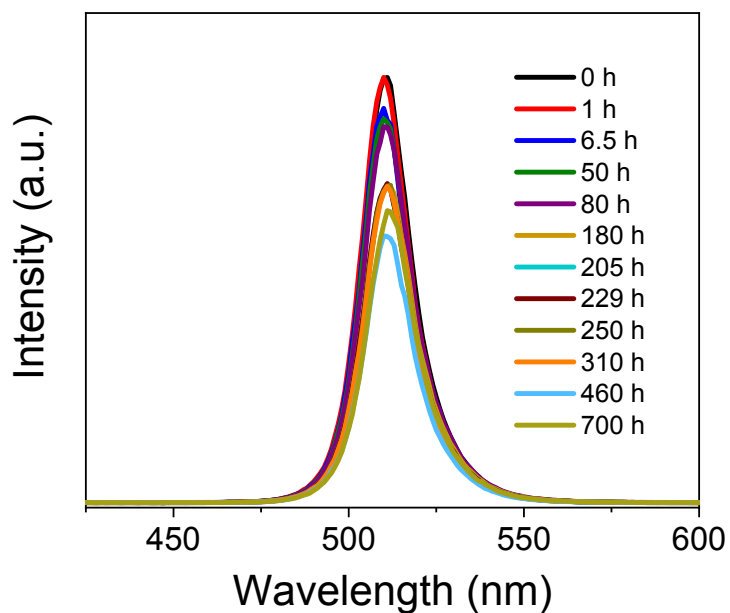

**Fig. S18** PL emission spectra at different time points in the continuous water treatment process of DP-capped QDs.

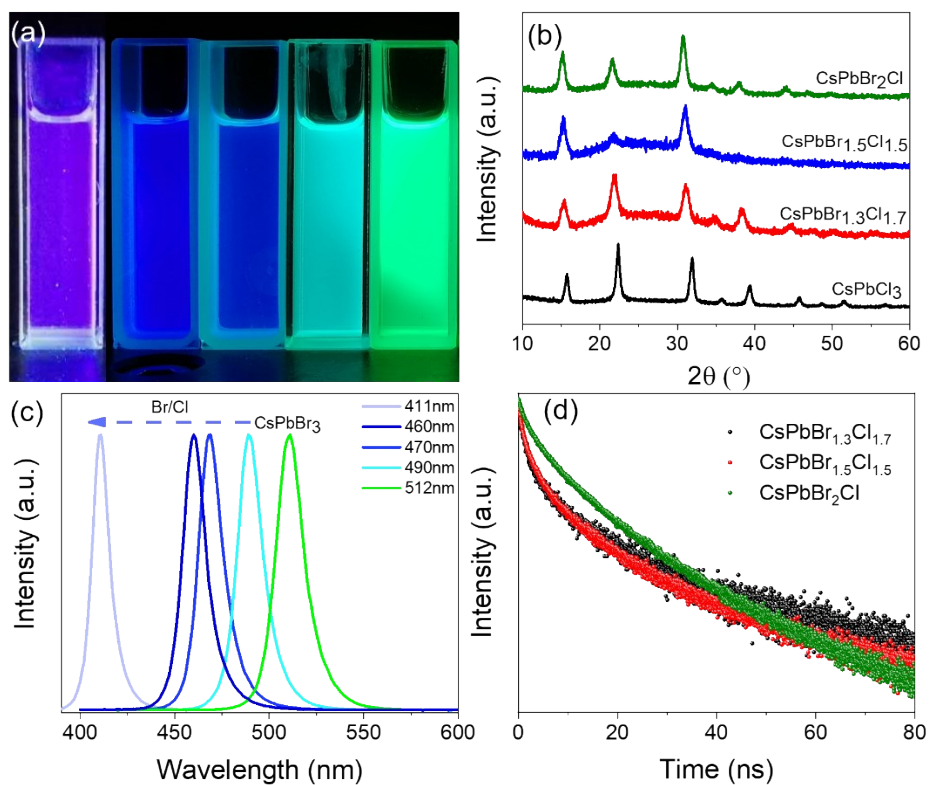

**Fig. S19** (a) The fluorescence photos under the 365nm UV light illumination, (b) PXRD patterns, (c) PL emission and (d) decay lifetimes of CsPbX<sub>3</sub> QDs.

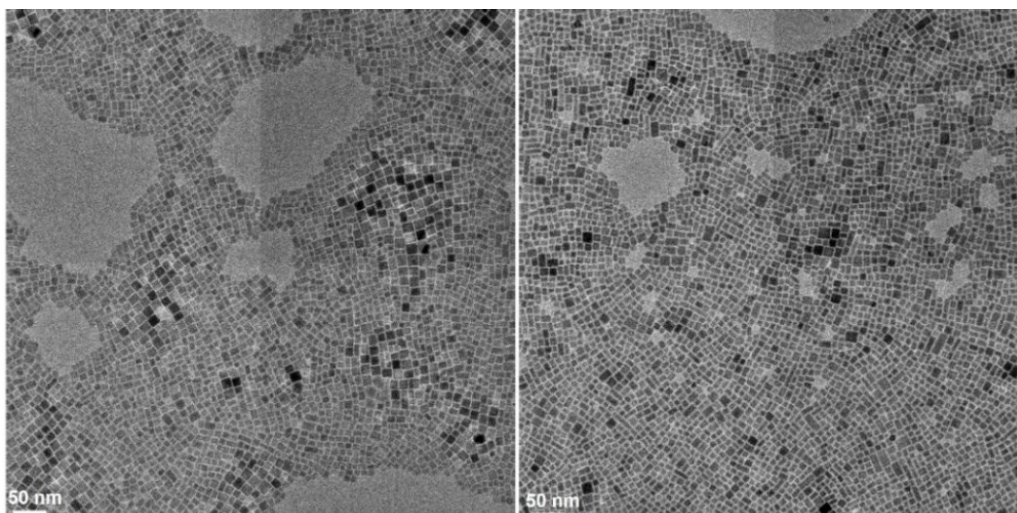

**Fig. S20** TEM images of CsPbBr<sub>2</sub>Cl QDs (left) and CsPbBr<sub>1.3</sub>Cl<sub>1.7</sub> QDs (right).

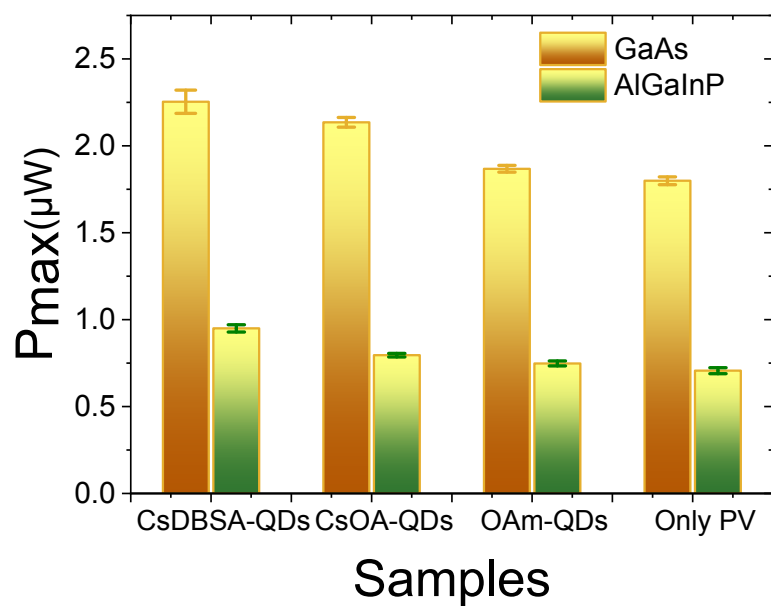

Fig. S21 Comparison of maximum output power values of different combinations of batteries

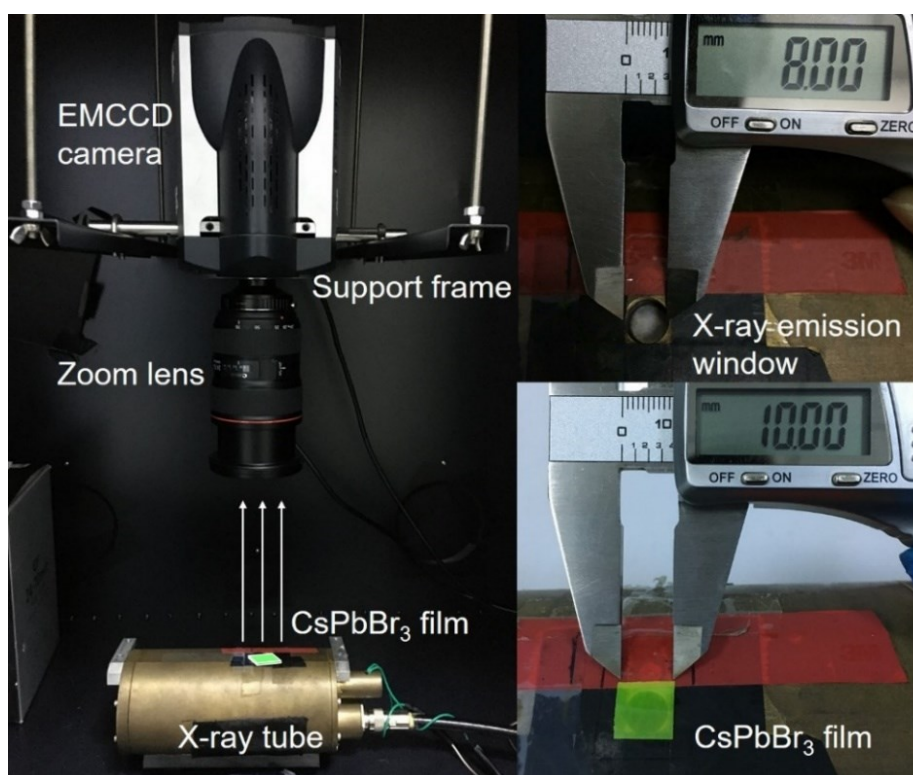

Fig. S22 Perovskite films radioluminescence test platform and imaging system.

**Table S1** The optical properties of CsOA-capped, DP-QDs and CsPbX<sub>3</sub> QDs.

| Materials (QDs)                         | Peak (nm) | FWHM (nm) | PLQY (%) | $\tau$ (ns) | $\tau_1$ (ns) | $\tau_2$ (ns) |
|-----------------------------------------|-----------|-----------|----------|-------------|---------------|---------------|
| CsOA                                    | 513       | 17        | 69       | 6.93        | 1.8           | 8.4           |
| DP                                      | 513       | 17        | 97+/-3   | 7.58        | 2.58          | 7.9           |
| CsPbBr <sub>1.3</sub> Cl <sub>1.7</sub> | 460       | 15        | 45       | 11.84       | 1.2           | 13.9          |
| CsPbBr <sub>1.5</sub> Cl <sub>1.5</sub> | 470       | 15        | 60       | 10.55       | 1.3           | 12.5          |
| CsPbBr <sub>2</sub> Cl                  | 490       | 16        | 90       | 12.35       | 2.4           | 14            |
